# Interaction between *GSTP1* Val Allele and *H. pylori* Infection, Smoking and Alcohol Consumption and Risk of Gastric Cancer among the Chinese Population

Ye Zhang<sup>1,9</sup>, Li-Ping Sun<sup>1,9</sup>, Cheng-Zhong Xing<sup>1</sup>, Qian Xu<sup>1</sup>, Cai-Yun He<sup>1</sup>, Ping Li<sup>1</sup>, Yue-Hua Gong<sup>1</sup>, Yun-Peng Liu<sup>2</sup>, Yuan Yuan<sup>1\*</sup>

**1** Tumor Etiology and Screening Department of Cancer Institute and General Surgery, The First Affiliated Hospital of China Medical University, and Key Laboratory of Cancer Control in Liaoning Province, Shenyang, China, **2** Department of Medical Oncology, The First Affiliated Hospital of China Medical University, Shenyang, China

## Abstract

Glutathione S-transferase P1 (*GSTP1*) is a critical enzyme in the phase II detoxification pathway. One of the common functional polymorphisms of *GSTP1* is A→G at nucleotide 313, which results in an amino acid substitution (Ile105Val) at the substrate binding site and reduced catalytic activity. We evaluated the interaction between *GSTP1* Val allele and *Helicobacter pylori* infection, smoking and alcohol consumption, increasing the risk of gastric cancer among the Chinese population. Information on potential gastric cancer risk factors and blood specimens were collected from 618 incident gastric cancer cases and 1,830 non-cancer controls between March 2002 and December 2011 in Liaoning Province, China. *GSTP1* Ile105Val was genotyped by matrix-assisted laser desorption/ionization time-of-flight mass spectrometry and polymerase chain reaction-restriction fragment length polymorphism. Serum levels of anti-*H. pylori* IgG were measured by ELISA. Odds ratio (OR) and 95% confidence interval (CI) were calculated using multivariate logistic regression, adjusted by sex and age. The risk of gastric cancer was significantly elevated in patients with the *GSTP1* Val/Val genotype (adjusted OR = 3.324; 95% CI = 1.790–6.172). An elevated risk of gastric cancer was observed in patients with *H. pylori* infection, smoking, or alcohol consumption, and together with the *GSTP1* Ile/Val +Val/Val genotype (OR = 3.696; 95% CI = 2.475–5.521; OR = 1.638; 95% CI = 1.044–2.571; OR = 1.641; 95% CI = 0.983–2.739, respectively) ( $p < 0.05$ ). The *GSTP1* Val allele shows an interaction with smoking, alcohol consumption, and especially *H. pylori* infection for increasing the risk of gastric cancer. These findings could demonstrate new pathophysiological pathways for the development of gastric cancer.

**Citation:** Zhang Y, Sun L-P, Xing C-Z, Xu Q, He C-Y, et al. (2012) Interaction between *GSTP1* Val Allele and *H. pylori* Infection, Smoking and Alcohol Consumption and Risk of Gastric Cancer among the Chinese Population. PLoS ONE 7(10): e47178. doi:10.1371/journal.pone.0047178

**Editor:** Xin-Yuan Guan, The University of Hong Kong, China

**Received:** July 26, 2012; **Accepted:** September 10, 2012; **Published:** October 15, 2012

**Copyright:** © 2012 Zhang et al. This is an open-access article distributed under the terms of the Creative Commons Attribution License, which permits unrestricted use, distribution, and reproduction in any medium, provided the original author and source are credited.

**Funding:** This study was supported by grants from the National Basic Research Program of China (973 Program) (no. 2010CB529304), the Foundation of the Key Laboratory in Liaoning Province (no. LS2010167), and the Foundation for the Scientific Research Fund of Liaoning Provincial Education Department (no. L2010641). The funders had no role in the study design, data collection and analysis, decision to publish, or preparation of the manuscript.

**Competing Interests:** The authors have declared that no competing interests exist.

\* E-mail: yyuan@mail.cmu.edu.cn

9 These authors contributed equally to this work.

## Introduction

Gastric cancer is one of the most frequently occurring cancers globally. A total of 989,600 new cases and 738,000 deaths are estimated to have occurred in 2008, accounting for 8% of the total number of cancer cases and 10% of cancer-related deaths [1]. The geographical distribution of gastric cancer exhibits wide international variation and >70% of new cases and deaths occur in developing countries. Investigations into the pathogenesis of gastric cancer have resulted in increasing evidence to suggest that interaction between various inherited cancer susceptibility genes could affect an individual's risk of developing gastric cancer [2]. These genes are also known as risk-modifier genes, particularly those whose allelic polymorphisms are responsible for impaired metabolism of environmental carcinogens and/or repair of oxidative-stress-induced DNA damage.

Since the first description by Krontiris in 1985 that the polymorphisms of the *RAS* gene can be used to assess the risk of oncogenesis [3], more studies have begun to demonstrate

associations between the polymorphisms and gastric cancer susceptibility, including oncogenes [4], antioncogenes [5,6] and immunomodifier genes [7,8]. It has also been suggested that genetic susceptibility genes, especially genes for metabolic enzymes, may confer a risk for the development of gastric cancer [9–11]. Glutathione S-transferases (*GST*<sub>s</sub>) consist of a superfamily of dimeric phase II metabolic enzymes [12]. Several polymorphisms in *GST* genes result in reduced or no activity of the enzymes. Specifically, *GSTM1* and *GSTT1* genes are polymorphically deleted [13,14]. The polymorphism *GSTP1*, c.313A>G determines the amino acid substitution Ile(105)Val, which results in reduced activity of the Val-containing enzyme [15,16]. The polymorphisms in *GSTM1* and *GSTT1* have been investigated in cancer for a long time; however, only recently have some studies investigated the association of various cancers with *GSTP1* variants. Some studies have observed a different relation between the *GSTP1* polymorphism and an increased risk for oral [17], breast [15,18], colorectal [19], prostate [20] and lung [21,22]

cancers. Regarding gastric cancer, only a few studies were conducted to investigate its association with *GSTP1* variants [23].

It has been increasingly accepted that the etiology of most common tumors involves not only genetic and environmental causes, but also interactions between the two. The finding that the strength of association between lifestyle and cancer occurrence is influenced by genotypes (gene–environment interaction) has opened the door to genotype applications for tumor prevention.

In this case–control molecular epidemiological study in a Chinese population we determined whether this *GSTP1* polymorphism influenced susceptibility to gastric cancer, as well as the interaction between the polymorphism and environmental factors (*Helicobacter pylori* infection, smoking, and alcohol consumption) involved in gastric carcinogenesis.

## Materials and Methods

### Study Population

A total of 2,448 patients with different gastric diseases were enrolled in this study, including gastric cancer (n = 618), atrophic gastritis (n = 683), and superficial gastritis as a control (n = 1,147). All patients were consecutively recruited from March 2002 to December 2011 in Liaoning Province, Northeast China, and were surveyed about their history of any illness. Before commencement of the study, approval was obtained from the Human Ethics Review Committee of China Medical University. Written informed consents were obtained from participants in accordance with the Declaration of Helsinki and its later revision.

### Data Collection and Laboratory Protocol

Cases and controls were interviewed face-to-face by trained interviewers using the same questionnaire. The diagnosis of gastric disease was established by upper gastrointestinal endoscopic examination and confirmed by histopathology. Histopathological findings were assessed according to the visual analog scale of the updated Sydney System [24]. Meanwhile, 5 ml of blood was collected from each patient to isolate DNA and measure serum *H. pylori* IgG. The blood samples were allowed to clot for 30–40 min at room temperature, and then centrifuged at 3,000 rpm for 10 min. The clots and sera were stored immediately at  $-20^{\circ}\text{C}$ , and then moved into a freezer at  $-70^{\circ}\text{C}$  within 3 days of collection.

All genomic DNA was extracted using the standard phenol–chloroform extraction procedure. In 915 cases, *GSTP1* Ile105Val single nucleotide polymorphism was genotyped by polymerase chain reaction–restriction fragment length polymorphism according to Watson et al [25], with a slight modification. In 1,595 cases, *GSTP1* was genotyped using a matrix-assisted laser desorption/ionization time-of-flight (MALDI-TOF) mass spectrometry platform (Sequenom, San Diego, CA, USA), according to the manufacturer's instructions. Duplicate samples (62 cases, 2.5% of the total) were included for the evaluation of genotyping quality and the concordance rate was 100%. Genotyping was successfully performed among 2,448 cases. No deviation from the Hardy–Weinberg equilibrium was observed ( $p = 0.946$ ,  $\chi^2 = 0.005$  in control group). Finally, there were 550 gastric cancer cases and 550 superficial gastritis controls, and 683 atrophic gastritis cases and 683 superficial gastritis controls included for analysis; controls were frequency-matched with cases by sex and age  $\pm 5$  years.

Serum *H. pylori* IgG antibody concentrations were each measured with ELISA (*Helicobacter pylori* IgG Kit; Biohit, Helsinki, Finland). An individual was considered positive if the IgG titer was above 34 EIU.

### Statistical Analysis

All statistical analysis was performed using the SPSS 17.0 statistical software (Chicago, IL, USA). Student's *t*-test and Pearson's  $\chi^2$  test were used to test for differences between groups. The association between the *GSTP1* polymorphism and risk of gastric cancer and atrophic gastritis was estimated by odds ratios (ORs) and 95% confidence intervals (CIs) adjusted by sex and age, together with the test for an interaction between the *GSTP1* polymorphism and *H. pylori* infection.  $P \leq 0.05$  was considered statistically significant.

## Results

### Characteristics of the Study Population

The frequency distributions of demographic and other selected characteristics of the participants are shown in Table 1. There was no significant difference in the distributions of age, sex, smoking status, and alcohol consumption between the superficial gastritis controls and atrophic gastritis cases. The *H. pylori*-positive rates of the superficial gastritis control and atrophic gastritis groups, the superficial gastritis control and gastric cancer groups were 25.8% (176 of 683) vs 60.8% (415 of 683), and 24.4% (134 of 550) vs 49.3% (271 of 550), respectively, and a significant difference was observed in the atrophic gastritis group compared to the superficial gastritis controls, and the gastric cancer group compared to the superficial gastritis controls. The smoking and alcohol consumption rates were of significantly different between the superficial gastritis controls and gastric cancer cases.

### Association between *GSTP1* Genotype and Risk of Gastric Cancer

To examine whether the risks of gastric cancer and its precancerous conditions were related to *GSTP1* genotype, we analyzed the association between *GSTP1* genotype and the risk of atrophic gastritis and gastric cancer. Compared with the patients with Ile/Ile genotype, those with Ile/Val or Val/Val genotype did not harbor a significantly higher risk of atrophic gastritis. However, in the gastric cancer group, using Ile/Ile genotype as a reference (OR = 1.00), the OR for Val/Val genotype was 3.324 (95% CI = 1.790–6.172), which showed a statistically significant increase in gastric cancer risk associated with Val/Val genotype (Table 2).

### Stratified Analysis

We further evaluated the association between the genotypes of *GSTP1* and risk of gastric cancer and its precancerous conditions by subgroups of age, sex, *H. pylori* infection, smoking status, and alcohol consumption. No significant differences were found in the atrophic gastritis group, except in the subgroup aged  $>60$  years (Table 3). In general, an increased atrophic gastritis risk associated with Ile/Val genotypes was more evident in subgroups aged  $>60$  years (adjusted OR = 1.824, 95% CI = 1.185–2.809). Moreover, patients with *GSTP1* Val/Val genotypes were associated with risk of gastric cancer in almost all subgroups except for non-smoking or non-alcohol consumption subgroups (adjusted OR and 95% CI, see Table 3).

### Characteristics of Patients with/without *H. pylori* Infection, Smoking, and Alcohol Consumption in Relation to *GSTP1* Polymorphisms

A variant of *GSTP1* has a lower efficiency for most of the environmental carcinogens (e.g. *H. pylori* infection, smoking, and alcohol consumption) that may cause some individuals' suscepti-

**Table 1.** Distribution of select patient characteristics.

| Variable                    | superficial gastritis vs. atrophic gastritis |                              |                      | superficial gastritis vs. gastric cancer |                          |                      |
|-----------------------------|----------------------------------------------|------------------------------|----------------------|------------------------------------------|--------------------------|----------------------|
|                             | superficial gastritis (n = 683)              | atrophic gastritis (n = 683) | P value <sup>a</sup> | superficial gastritis (n = 550)          | gastric cancer (n = 550) | P value <sup>a</sup> |
| <b>Age (mean±SD), years</b> | 55.16±9.26                                   | 55.05±9.21                   | 0.824                | 56.63±9.77                               | 57.22±10.17              | 0.328                |
| ≤60                         | 494                                          | 496                          | 0.904                | 364                                      | 344                      | 0.208                |
| >60                         | 189                                          | 187                          |                      | 186                                      | 206                      |                      |
| <b>Sex</b>                  |                                              |                              |                      |                                          |                          |                      |
| Male                        | 393                                          | 393                          | 1.000                | 373                                      | 373                      | 1.000                |
| Female                      | 290                                          | 290                          |                      | 177                                      | 177                      |                      |
| <b>H. pylori</b>            |                                              |                              |                      |                                          |                          |                      |
| Positive                    | 176                                          | 415                          | <b>0.000*</b>        | 134                                      | 271                      | <b>0.000*</b>        |
| Negative                    | 507                                          | 268                          |                      | 416                                      | 279                      |                      |
| <b>Smoking status</b>       |                                              |                              |                      |                                          |                          |                      |
| Smoker                      | 185                                          | 181                          | 0.212                | 171                                      | 141                      | <b>0.002*</b>        |
| Non-smoker                  | 320                                          | 368                          |                      | 213                                      | 106                      |                      |
| Missing                     | 178                                          | 134                          |                      | 166                                      | 303                      |                      |
| <b>Alcohol use</b>          |                                              |                              |                      |                                          |                          |                      |
| Yes                         | 122                                          | 129                          | 0.687                | 111                                      | 84                       | <b>0.002*</b>        |
| No                          | 372                                          | 417                          |                      | 264                                      | 115                      |                      |
| Missing                     | 189                                          | 137                          |                      | 175                                      | 351                      |                      |

<sup>a</sup>P value of the comparison with a two-sided  $\chi^2$  test.

\*Indicates statistical significance at  $P<0.05$ .

doi:10.1371/journal.pone.0047178.t001

bility to gastric cancer and its precancerous conditions [26–28]. Therefore, we looked for interaction between *GSTP1* genotype and *H. pylori* IgG, smoking, or alcohol consumption in gastric cancer and its precancerous conditions. Using Ile/Ile genotype and *H. pylori* IgG(–) as a reference, the OR for (Ile/Val +Val/Val) genotype and *H. pylori* IgG(+) was 4.308 (95% CI = 3.062–6.061) in atrophic gastritis subgroups, and the OR for (Ile/Val +Val/Val) genotype and *H. pylori* IgG(+) was 3.696 (95% CI = 2.475–5.521) in gastric cancer subgroups. Using Ile/Ile genotype and non-smoking as a reference, the OR for (Ile/Val +Val/Val) genotype and smoking was 0.782 (95% CI = 0.538–1.136) in atrophic gastritis subgroups, and the OR for (Ile/Val +Val/Val) genotype and smoking was 1.638 (95% CI = 1.044–2.571) in gastric cancer subgroups. Using Ile/Ile genotype and non-alcohol consumption as a reference, the OR for (Ile/Val +Val/Val) genotype and alcohol consumption was 0.862 (95% CI = 0.565–1.313) in

atrophic gastritis subgroups, and the OR for (Ile/Val +Val/Val) genotype and alcohol consumption was 1.641 (95% CI = 0.983–2.739) in gastric cancer subgroups. Association of the *GSTP1* Val/Val genotype with *H. pylori* IgG(+), smoking, or alcohol consumption could significantly increase atrophic gastritis and gastric cancer risk (Tables 4 and 5).

## Discussion

Over the past 20 years, there has been marked progress in our understanding of the role of genetic and environmental factors in the etiology of gastric cancer. GSTs are multifunctional and multigene products. They are versatile enzymes and participate in the nucleophilic attack of the sulfur atom of glutathione on the electrophilic centers of various endogenous and xenobiotic compounds. Out of the major classes of GSTs, *GSTP1* has

**Table 2.** Genotype distribution of *GSTP1* among atrophic gastritis and gastric cancer cases and superficial gastritis controls and association with gastric cancer risk.

|         | superficial gastritis vs. atrophic gastritis |                    |                      |       | superficial gastritis vs gastric cancer |                |                           |              |
|---------|----------------------------------------------|--------------------|----------------------|-------|-----------------------------------------|----------------|---------------------------|--------------|
|         | superficial gastritis                        | atrophic gastritis | Adjusted OR (95% CI) | P     | superficial gastritis                   | gastric cancer | Adjusted OR(95% CI)       | P            |
| Ile/Ile | 421                                          | 430                | 1.000                |       | 343                                     | 331            | 1.000                     |              |
| Ile/Val | 247                                          | 230                | 1.096(0.876–1.372)   | 0.422 | 193                                     | 174            | 0.929(0.720–1.199)        | 0.571        |
| Val/Val | 15                                           | 23                 | 0.666(0.343–1.294)   | 0.230 | 14                                      | 45             | <b>3.324(1.790–6.172)</b> | <b>0.000</b> |

Statistically significant results ( $P<0.05$ ) are highlighted in bold.

<sup>a</sup>ORs were calculated by logistic regression, and adjusted for age and sex.

doi:10.1371/journal.pone.0047178.t002

**Table 3.** Stratification analysis of association between *GSTP1* genotype and gastric cancer risk.

| Variables        | Genotype | Superficial gastritis vs. atrophic gastritis | OR (95% CI)         | P value | Superficial gastritis vs. gastric cancer | OR (95% CI)        | P value |
|------------------|----------|----------------------------------------------|---------------------|---------|------------------------------------------|--------------------|---------|
| <b>Age/year</b>  |          |                                              |                     |         |                                          |                    |         |
| ≤60              | Ile/Ile  | 317/302                                      | 1.000               |         | 238/212                                  | 1.000              |         |
|                  | Ile/Val  | 167/176                                      | 0.904(0.694–1.177)  | 0.454   | 117/104                                  | 1.001(0.725–1.382) | 0.997   |
|                  | Val/Val  | 10/18                                        | 0.529(0.24–1.165)   | 0.114   | 9/28                                     | 3.482(1.606–7.547) | 0.002   |
| >60              | Ile/Ile  | 104/128                                      | 1.000               |         | 105/119                                  | 1.000              |         |
|                  | Ile/Val  | 80/54                                        | 1.824(1.185–2.809)  | 0.006   | 76/70                                    | 0.815(0.537–1.238) | 0.337   |
|                  | Val/Val  | 5/5                                          | 1.232(0.347–4.373)  | 0.746   | 5/17                                     | 2.981(1.063–8.364) | 0.038   |
| <b>Sex</b>       |          |                                              |                     |         |                                          |                    |         |
| Male             | Ile/Ile  | 238/244                                      | 1.000               |         | 226/228                                  | 1.000              |         |
|                  | Ile/Val  | 146/136                                      | 0.909(0.677–1.22)   | 0.524   | 138/115                                  | 0.821(0.603–1.119) | 0.212   |
|                  | Val/Val  | 9/13                                         | 1.408(0.591–3.356)  | 0.44    | 9/30                                     | 3.297(1.53–7.104)  | 0.002   |
| Female           | Ile/Ile  | 183/186                                      | 1.000               |         | 117/103                                  |                    |         |
|                  | Ile/Val  | 101/94                                       | 0.921(0.65–1.305)   | 0.645   | 55/59                                    | 1.213(0.771–1.909) | 0.404   |
|                  | Val/Val  | 6/10                                         | 10.641(0.584–4.609) | 0.347   | 5/15                                     | 3.402(1.195–9.687) | 0.022   |
| <b>H. pylori</b> |          |                                              |                     |         |                                          |                    |         |
| Negative         | Ile/Ile  | 311/175                                      | 1.000               |         | 253/168                                  | 1.000              |         |
|                  | Ile/Val  | 186/84                                       | 0.804(0.585–1.106)  | 0.180   | 153/92                                   | 0.887(0.64–1.228)  | 0.470   |
|                  | Val/Val  | 10/9                                         | 1.600(0.638–4.014)  | 0.317   | 10/19                                    | 2.788(1.263–6.153) | 0.011   |
| Positive         | Ile/Ile  | 110/255                                      | 1.000               |         | 90/163                                   | 1.000              |         |
|                  | Ile/Val  | 61/146                                       | 1.036(0.713–1.506)  | 0.852   | 40/82                                    | 1.129(0.714–1.784) | 0.603   |
|                  | Val/Val  | 5/14                                         | 1.210(0.425–3.443)  | 0.721   | 4/26                                     | 3.538(1.196–10.47) | 0.022   |
| <b>Smoking</b>   |          |                                              |                     |         |                                          |                    |         |
| Neative          | Ile/Ile  | 197/233                                      | 1.000               |         | 136/69                                   | 1.000              |         |
|                  | Ile/Val  | 117/122                                      | 0.884(0.644–1.214)  | 0.446   | 72/32                                    | 0.879(0.525–1.473) | 0.625   |
|                  | Val/Val  | 6/13                                         | 1.828(0.682–4.898)  | 0.231   | 5/5                                      | 1.841(0.505–6.709) | 0.355   |
| Positive         | Ile/Ile  | 107/109                                      | 1.000               |         | 100/82                                   | 1.000              |         |
|                  | Ile/Val  | 74/70                                        | 0.921(0.602–1.41)   | 0.705   | 67/47                                    | 0.87(0.539–1.407)  | 0.571   |
|                  | Val/Val  | 4/2                                          | 0.493(0.088–2.77)   | 0.422   | 4/12                                     | 3.638(1.122–11.79) | 0.031   |
| <b>Alcohols</b>  |          |                                              |                     |         |                                          |                    |         |
| Negative         | Ile/Ile  | 231/263                                      | 1.000               |         | 170/74                                   | 1.000              |         |
|                  | Ile/Val  | 132/142                                      | 0.948(0.705–1.275)  | 0.725   | 86/32                                    | 0.836(0.508–1.376) | 0.482   |
|                  | Val/Val  | 9/12                                         | 1.167(0.483–2.823)  | 0.731   | 8/9                                      | 2.635(0.965–7.197) | 0.059   |
| Positive         | Ile/Ile  | 69/77                                        | 1.000               |         | 62/49                                    | 1.000              |         |
|                  | Ile/Val  | 52/49                                        | 0.847(0.509–1.41)   | 0.523   | 48/28                                    | 0.744(0.404–1.371) | 0.343   |
|                  | Val/Val  | 1/3                                          | 2.657(0.27–26.175)  | 0.402   | 1/7                                      | 9.88(1.173–83.22)  | 0.035   |

doi:10.1371/journal.pone.0047178.t003

significance in the diagnosis of cancer because it is expressed abundantly in tumor cells [29–31]. It is a single gene product, coded by seven exons. Some studies have observed that a relation between the *GSTP1* polymorphism and *GSTP1* is involved in some cellular functions. The best characterized of these is its role as a phase II enzyme in which it catalyzes the S-conjugation of glutathione (GSH) with a wide variety of electrophilic compounds, including many mutagens, carcinogens, anticancer agents, and their metabolites. Polymorphisms of *GSTP1* have been reported, isoleucine (Ile) 105 valine (Val) in exon 5 and alanine (Ala) 114 valine (Val) in exon 6 [32]. The activity of this enzyme is affected by substitution at position 105, which is located in the hydrophobic substrate binding site, and this has considerable

affects depending on the type of chemical reaction. It has been suggested that compared with *GSTP1* Ile 105, *GSTP1* Val 105 has a higher catalytic efficiency with regard to the metabolism of carcinogenic aromatic epoxides [33,34].

In the present case-control study, we reported that the polymorphism of *GSTP1* was significantly associated with an increased risk of gastric cancer in the Chinese population. At present, there are few reports about the association between the polymorphisms of *GSTP1* and the risk of gastric cancer. Researchers in the USA [35] have reported that the *GSTP1* genotype seemed not to be associated with the risk of gastric cancer and chronic gastritis in a high-risk Chinese population. The results detected by Katoh et al [36] suggest the frequency of the

**Table 4.** Interaction between *GSTP1* Ile/Val polymorphism and *H. pylori* infection, smoking, and alcohol consumption in atrophic gastritis.

|                  |                                              | superficial gastritis vs. atrophic gastritis |                    |                     |                    |
|------------------|----------------------------------------------|----------------------------------------------|--------------------|---------------------|--------------------|
|                  |                                              | Ile/Ile                                      | Ile/Val            | Val/Val             | Ile/Val + Val/Val  |
| <i>H. pylori</i> | (-) superficial gastritis/atrophic gastritis | 311/175                                      | 186/84             | 10/9                | 196/93             |
|                  | OR (95% CI)                                  | 1.000                                        | 0.803(0.584–1.102) | 1.599(0.638–4.011)  | 0.843(0.619–1.148) |
|                  | (+) superficial gastritis/atrophic gastritis | 110/255                                      | 61/146             | 5/14                | 66/160             |
|                  | OR (95% CI)                                  | 4.12(3.082–5.508)                            | 4.253(2.993–6.045) | 4.976(1.763–14.047) | 4.308(3.062–6.061) |
|                  |                                              |                                              | <b>P= 0.000</b>    | <b>P= 0.000</b>     | <b>P= 0.000</b>    |
| Smoking          | (-) superficial gastritis/atrophic gastritis | 197/233                                      | 117/122            | 6/13                | 123/135            |
|                  | OR (95% CI)                                  | 1.000                                        | 0.882(0.642–1.21)  | 1.832 (0.684–4.909) | 0.937(0.687–1.279) |
|                  | (+) superficial gastritis/atrophic gastritis | 107/109                                      | 74/70              | 4/2                 | 78/72              |
|                  | OR (95% CI)                                  | 0.861(0.621–1.195)                           | 0.8(0.548–1.167)   | 0.423(0.077–2.333)  | 0.782(0.538–1.136) |
|                  |                                              |                                              | <b>P= 0.621</b>    | <b>P= 0.308</b>     | <b>P= 0.566</b>    |
| Alcohol          | (-) superficial gastritis/atrophic gastritis | 231/263                                      | 132/142            | 9/12                | 141/154            |
|                  | OR (95% CI)                                  | 1.000                                        | 0.945(0.703–1.27)  | 1.171(0.485–2.829)  | 0.959(0.719–1.281) |
|                  | (+) superficial gastritis/atrophic gastritis | 69/77                                        | 52/49              | 1/3                 | 53/52              |
|                  | OR (95% CI)                                  | 0.98(0.677–1.419)                            | 0.828(0.539–1.27)  | 2.635(0.272–25.507) | 0.862(0.565–1.313) |
|                  |                                              |                                              | <b>P= 0.852</b>    | <b>P= 0.815</b>     | <b>P= 0.920</b>    |

*P* values were adjusted for age and sex.  
doi:10.1371/journal.pone.0047178.t004

*GSTP1* allele Val is increasing in gastric cancer in the Japanese population, but this has not yet obtained statistical significance. We found that there was a significant difference in the *GSTP1* polymorphic types between the gastric cancer cases and superficial gastritis controls. The frequency of *GSTP1* Val/Val genotypes was significantly higher in the gastric cancer group, compared with Ile/Ile or Ile/Val genotypes. The analysis showed a statistically

significant 3.324-fold increase in gastric cancer risk associated with the *GSTP1* allele Val. This suggests that individuals from Northern China with *GSTP1* allele Val have an increased risk of gastric cancer, but not atrophic gastritis (one of the precancerous conditions). However, it's worth mentioning that in subgroups aged >60 years, an increased atrophic gastritis risk associated with Ile/Val genotypes was more evident. These findings revealed that

**Table 5.** Interaction between *GSTP1* Ile/Val polymorphism and *H. pylori* infection, smoking, and alcohol consumption in gastric cancer.

|                  |                                          | superficial gastritis vs gastric cancer |                    |                       |                    |
|------------------|------------------------------------------|-----------------------------------------|--------------------|-----------------------|--------------------|
|                  |                                          | Ile/Ile                                 | Ile/Val            | Val/Val               | Ile/Val + Val/Val  |
| <i>H. pylori</i> | (-) superficial gastritis/gastric cancer | 253/168                                 | 153/92             | 10/19                 | 163/111            |
|                  | OR (95% CI)                              | 1.000                                   | 0.906(0.655–1.252) | 2.861(1.298–6.306)    | 1.026(0.752–1.399) |
|                  | (+) superficial gastritis/gastric cancer | 90/163                                  | 40/82              | 4/26                  | 44/108             |
|                  | OR (95% CI)                              | 2.727(1.975–3.767)                      | 3.087(2.018–4.724) | 9.789(3.356–28.555)   | 3.696(2.475–5.521) |
|                  |                                          |                                         | <b>P= 0.000</b>    | <b>P= 0.000</b>       | <b>P= 0.000</b>    |
| Smoking          | (-) superficial gastritis/gastric cancer | 136/69                                  | 72/32              | 5/5                   | 77/37              |
|                  | OR (95% CI)                              | 1.000                                   | 0.876(0.527–1.455) | 1.971(0.552–7.04)     | 0.947(0.582–1.542) |
|                  | (+) superficial gastritis/gastric cancer | 100/82                                  | 67/47              | 4/12                  | 71/59              |
|                  | OR (95% CI)                              | 1.616(1.071–2.439)                      | 1.383(0.862–2.217) | 5.913(1.839–19.015)   | 1.638(1.044–2.571) |
|                  |                                          |                                         | <b>P= 0.040</b>    | <b>P= 0.003</b>       | <b>P= 0.023</b>    |
| Alcohol          | (-) superficial gastritis/gastric cancer | 170/74                                  | 86/32              | 8/9                   | 94/41              |
|                  | OR (95% CI)                              | 1.000                                   | 0.855(0.524–1.394) | 2.584(0.96–6.96)      | 1.002(0.634–1.583) |
|                  | (+) superficial gastritis/gastric cancer | 62/49                                   | 48/28              | 1/7                   | 49/35              |
|                  | OR (95% CI)                              | 1.816(1.142–2.886)                      | 1.34 (0.781–2.3)   | 16.081(1.944–133.038) | 1.641(0.983–2.739) |
|                  |                                          |                                         | <b>P= 0.028</b>    | <b>P= 0.000</b>       | <b>P= 0.027</b>    |

*P* values were adjusted for age and sex.  
doi:10.1371/journal.pone.0047178.t005

the *GSTP1* Ile/Val polymorphism could affect the stage of gastric carcinogenesis, the extent of atrophic gastritis as a precancerous lesion.

Compared with other studies, we found that the allele Val frequencies of *GSTP1* (21.1%) were significantly different from those in western people, such as European-Americans (33%) and African-Americans (42%) [25,37]. This suggests the possibility of *GSTP1*-genotype-associated ethnic differences. The fact that, in our study, genotype frequencies among the population fitted the Hardy-Weinberg law further supports this view. The mechanism of the association between *GSTP1* gene polymorphism and gastric cancer was not clear in our study. However, it can be supposed that *GSTP1* is a major GST isoform expressed in human gastrointestinal epithelium, which can eliminate DNA oxidative products of thymidine or uracil propanal. After induction by cytochrome P450, some tumor-related carcinogens, such as benzo[a]pyrene diol epoxide and acrolein, can also be eliminated by *GSTP1*. The Ile→Val substitution may be associated with a higher level of DNA adducts, thus increasing the susceptibility to gastric cancer induction.

Furthermore, stratified analyses revealed that subgroups of smoking or alcohol consumption were more likely to have been diagnosed with gastric cancer. Our analysis supports there being an elevated risk of gastric cancer among individuals with *H. pylori* infection, smoking, or alcohol consumption, and the *GSTP1* Val/Val genotype.

*H. pylori* has been assigned as a class I carcinogen by the World Health Organization, and acts as the initiating agent [38]. Serological *H. pylori* IgG testing was a useful noninvasive strategy for testing for *H. pylori*. It was particularly useful in areas where the prevalence of *H. pylori* was high. We investigated the interaction between *GSTP1* genotype and *H. pylori* infection in gastric cancer and its precancerous conditions. Association of the *GSTP1* Val/Val genotype with *H. pylori* infection significantly increased gastric cancer and atrophic gastritis risk. This important finding suggests that *GSTP1* genotyping and *H. pylori* IgG seropositivity could be used to identify individuals with a high risk of gastric cancer and its precancerous conditions. The mechanism of action might be that the *H. pylori* infection resulting in gastric cancer and its precancerous conditions depends on genetic polymorphisms

influencing the virulence of the organism. *GSTP1* Ile/Ile has a higher catalytic efficiency than *GSTP1* Ile/Val or Val/Val for most environmental carcinogens, including cytokines produced by *H. pylori* infection. These cytokines that could not be detoxified by *GSTP1* could directly induce gastric mucosal damage and eventually lead to development of atrophic gastritis and even gastric cancer. The exact molecular biology mechanisms need further exploration.

Tobacco smoking and alcohol consumption are the main known etiological factors of some cancers. In this study, we observed that higher ratios of people in the gastric cancer group had consumed tobacco and alcohol (57.1% and 42.2%, respectively), compared with the controls (44.5% and 29.6%, respectively) (Table 1). This finding indicated that alcohol and tobacco consumption are highly associated with increased risk for gastric cancer. Long-term tobacco smoking and alcohol consumption have been shown to contribute to carcinogenesis [39]. Tobacco consumption can significantly increase nuclear hypoxia-inducible factor (HIF)-1 $\alpha$  expression, and alcohol can increase protein levels of c-fos and c-jun proto-oncogenes [40,41]. Association of the *GSTP1* Val/Val genotype with smoking or alcohol consumption could significantly increase atrophic gastritis and gastric cancer risk. This phenomenon might be caused by alterations in catalytic efficiency between tobacco and alcohol constituents and the polymorphic *GSTP1* gene. These findings provide a possible molecular explanation for the synergistic effect of smoking and alcohol consumption on gastric cancer development. However, details of the mechanism must be verified by other well-designed experiments.

In conclusion, our results suggest that polymorphism of *GSTP1* may contribute to gastric cancer susceptibility in the Chinese population. Moreover, the combined effect of *GSTP1* Val allele with environmental carcinogens (*H. pylori* infection, smoking, and alcohol consumption) significantly increases the risk of gastric cancer development.

## Author Contributions

Conceived and designed the experiments: YY. Performed the experiments: YZ LPS CYH PL YHG. Analyzed the data: LPS YZ QX. Contributed reagents/materials/analysis tools: YY CZX YPL. Wrote the paper: YZ.

## References

- Jemal A, Bray F, Center MM, Ferlay J, Ward E, et al. (2011) Global cancer statistics. *CA Cancer J Clin* 61: 69–90.
- Palli D, Polidoro S, D'Errico M, Saieva C, Guarrera S, et al. (2010) Polymorphic DNA repair and metabolic genes: a multigenic study on gastric cancer. *Mutagenesis* 25: 569–75.
- Krontiris TG, DiMartino NA, Colb M, Parkinson DR (1985) Unique allelic restriction fragments of the human Ha-ras locus in leukocyte and tumour DNAs of cancer patients. *Nature* 313: 369–74.
- Zhang Y, Jin M, Liu B, Ma X, Yao K, et al. (2008) Association between H-RAS T81C genetic polymorphism and gastrointestinal cancer risk: a population based case-control study in China. *BMC Cancer* 8: 256.
- Yamada H, Shinmura K, Goto M, Iwazumi M, Konno H, et al. (2009) Absence of germline mono-allelic promoter hypermethylation of the CDH1 gene in gastric cancer patients. *Mol Cancer* 8: 63.
- Song HR, Kweon SS, Kim HN, Piao JM, Yun WJ, et al. (2011) p53 codon 72 polymorphism in patients with gastric and colorectal cancer in a Korean population. *Gastric Cancer* 14: 242–8.
- Yu J, Jia Y, Cheung KF, Zeng Z, Tian L, et al. (2011) Polymorphisms in interleukin-6-6331 influences the susceptibility of a Chinese population to gastric cancer. *Cancer Invest* 29: 564–72.
- Persson C, Canedo P, Machado JC, El-Omar EM, Forman D (2011) Polymorphisms in inflammatory response genes and their association with gastric cancer: A HuGE systematic review and meta-analyses. *Am J Epidemiol* 173: 259–70.
- Darazy M, Balbaa M, Mugharbil A, Saeed H, Sidani H, et al. (2011) CYP1A1, CYP2E1, and GSTM1 gene polymorphisms and susceptibility to colorectal and gastric cancer among Lebanese. *Genet Test Mol Biomarkers* 15: 423–9.
- Luo YP, Chen HC, Khan MA, Chen FZ, Wan XX, et al. (2011) Genetic polymorphisms of metabolic enzymes-CYP1A1, CYP2D6, GSTM1, and GSTT1, and gastric carcinoma susceptibility. *Tumour Biol* 32: 215–22.
- Niwa T, Ushijima T (2010) Induction of epigenetic alterations by chronic inflammation and its significance on carcinogenesis. *Adv Genet* 71: 41–56.
- Jana S, Mandlekar S (2009) Role of phase II drug metabolizing enzymes in cancer chemoprevention. *Curr Drug Metab* 10: 595–616.
- Moyer AM, Salavaggione OE, Hebbiring SJ, Moon I, Hildebrandt MA, et al. (2007) Glutathione S-transferase T1 and M1: gene sequence variation and functional genomics. *Clin Cancer Res* 13: 7207–16.
- Souiden Y, Mahdouani M, Chaieb K, Elkamel R, Mahdouani K (2010) Polymorphisms of glutathione-S-transferase M1 and T1 and prostate cancer risk in a Tunisian population. *Cancer Epidemiol* 34: 598–603.
- Romero A, Martin M, Oliva B, de la Torre J, Furio V, et al. (2011) Glutathione S-transferase P1 c.313A > G polymorphism could be useful in the prediction of doxorubicin response in breast cancer patients. *Ann Oncol* 23: 1750–6.
- Sweeney C, McClure GY, Fares MY, Stone A, Coles BF, et al. (2000) Association between survival after treatment for breast cancer and glutathione S-transferase P1 Ile105Val polymorphism. *Cancer Res* 60: 5621–4.
- Karen-Ng LP, Marhazlinda J, Rahman ZA, Yang YH, Jalil N, et al. (2011) Combined effects of isothiocyanate intake, glutathione S-transferase polymorphisms and risk habits for age of oral squamous cell carcinoma development. *Asian Pac J Cancer Prev* 12: 1161–6.
- Ramalhinho AC, Fonseca-Moutinho JA, Breitenfeldt Granadeiro LA (2012) Positive Association of Polymorphisms in Estrogen Biosynthesis Gene, CYP19A1, and Metabolism, GST, in Breast Cancer Susceptibility. *DNA Cell Biol* 31: 1100–6.

19. Epplein M, Wilkens LR, Tiiirikainen M, Dyba M, Chung FL, et al. (2009) Urinary isothiocyanates; glutathione S-transferase M1, T1, and P1 polymorphisms; and risk of colorectal cancer: the Multiethnic Cohort Study. *Cancer Epidemiol Biomarkers Prev* 18: 314–20.
20. Qadri Q, Sameer AS, Shah ZA, Hamid A, Alam S, et al. (2011) Genetic polymorphism of the glutathione-S-transferase P1 gene (GSTP1) and susceptibility to prostate cancer in the Kashmiri population. *Genet Mol Res* 10: 3038–45.
21. Vural B, Yakar F, Derin D, Saip P, Yakar A, et al. (2012) Evaluation of Glutathione S-Transferase P1 Polymorphisms (Ile105Val and Ala114Val) in Patients with Small Cell Lung Cancer. *Genet Test Mol Biomarkers* 16: 701–6.
22. Ihsan R, Chauhan PS, Mishra AK, Yadav DS, Kaushal M, et al. (2011) Multiple analytical approaches reveal distinct gene-environment interactions in smokers and non smokers in lung cancer. *PLoS One* 6: e29431.
23. Wang ZY, Zhou J, Luo L, Huang YL, Dong PD (2012) Predictive Role of Glutathione-S-transferase Gene Polymorphisms in the Survival of Gastric Cancer Cases. *Asian Pac J Cancer Prev* 13: 1515–8.
24. Stolte M, Meining A (2001) The updated Sydney system: classification and grading of gastritis as the basis of diagnosis and treatment. *Can J Gastroenterol* 15: 591–8.
25. Watson MA, Stewart RK, Smith GB, Massey TE, Bell DA (1998) Human glutathione S-transferase P1 polymorphisms: relationship to lung tissue enzyme activity and population frequency distribution. *Carcinogenesis* 19: 275–80.
26. Wang G, Yu D, Tan W, Zhao D, Wu C, et al. (2009) Genetic polymorphism in chemokine CCL22 and susceptibility to *Helicobacter pylori* infection-related gastric carcinoma. *Cancer* 115: 2430–7.
27. Ferrand J, Lehours P, Schmid-Alliana A, Mégraud F, Varon C (2011) *Helicobacter pylori* infection of gastrointestinal epithelial cells in vitro induces mesenchymal stem cell migration through an NF- $\kappa$ B-dependent pathway. *PLoS One* 6: e29007.
28. Mikko S (2012) Interactions of alcohol and tobacco in gastrointestinal cancer. *J Gastroenterol Hepatol Suppl* 2: 135–9.
29. Hauptstock V, Kuriakose S, Schmidt D, Düster R, Müller SC, et al. (2011) Glutathione-S-transferase pi 1 (GSTP1) gene silencing in prostate cancer cells is reversed by the histone deacetylase inhibitor depsipeptide. *Biochem Biophys Res Commun* 412: 606–11.
30. Vecanova J, Hodorova I, Mihalik J, Benicky M, Kluchova D, et al. (2011) Immunohistochemical evaluation of Pi class glutathione S-transferase expression in invasive breast carcinoma. *Bratisl Lek Listy* 112: 67–70.
31. Zhang Y, Qu X, Jing W, Hu X, Yang X, et al. (2009) GSTP1 determines cisplatin cytotoxicity in gastric adenocarcinoma MGC803 cells: regulation by promoter methylation and extracellular regulated kinase signaling. *Anticancer Drugs* 20: 208–14.
32. Strange RC, Fryer AA (1999) The glutathione S-transferases: influence of polymorphism on cancer susceptibility. *IARC Sci Publ* 148: 231–49.
33. Vaughn MP, Biswal Shinohara D, Castagna N, Hicks JL, Netto G, et al. (2011) Humanizing  $\pi$ -class glutathione S-transferase regulation in a mouse model alters liver toxicity in response to acetaminophen overdose. *PLoS One* 6: e25707.
34. Hu X, Herzog C, Zimniak P, Singh SV (1999) Differential protection against benzo[a]pyrene-7,8-dihydrodiol-9,10-epoxide-induced DNA damage in HepG2 cells stably transfected with allelic variants of pi class human glutathione S-transferase. *Cancer Res* 59: 2358–62.
35. Setiawan VW, Zhang ZF, Yu GP, Lu QY, Li YL, et al. (2001) GSTP1 polymorphisms and gastric cancer in a high-risk Chinese population. *Cancer Causes Control* 12: 673–81.
36. Katoh T, Kaneko S, Takasawa S, Nagata N, Inatomi H, et al. (1999) Human glutathione S-transferase P1 polymorphism and susceptibility to smoking related epithelial cancer; oral, lung, gastric, colorectal and urothelial cancer. *Pharmacogenetics* 9: 165–9.
37. Zhang Y, Sun LP, Chen W, Bai XL, Liu J, et al. (2007) A molecular epidemiological study on the relationship between the polymorphism of GSTP1 and susceptibility to gastric cancer in northern Chinese. *Yi Chuan* 29: 293–300.
38. IARC-International Agency for Research on Cancer (1994) Infection with *Helicobacter pylori*. *IARC Monogr Eval Carcinog Risks Hum* 61: 177–240.
39. McCullough MJ, Farah CS (2008) The role of alcohol in oral carcinogenesis with particular reference to alcohol-containing mouthwashes. *Aust Dent J* 53: 302–5.
40. Ding WQ, Fried U, Larsson C, Alling C (1998) Ethanol exposure potentiates fosB and junB expression induced by muscarinic receptor stimulation in neuroblastoma SH-SY5Y cells. *Alcohol Clin Exp Res* 22: 225–30.
41. Huang B, Liu B, Yang L, Li Y, Cheng M, et al. (2012) Functional genetic variants of c-Jun and their interaction with smoking and drinking increase the susceptibility to lung cancer in southern and eastern Chinese. *Int J Cancer* 131: E744–58.
